# Supplementary material for: Concentrations of Mg, Ca, Fe, Cu, Zn, P and anthropometric and biochemical parameters in adults with chronic heart failure
Source: PeerJ. 2021 Nov 1;9:e12207. doi: 10.7717/peerj.12207 (PMC8567860; doi:10.7717/peerj.12207)
Supplement: Supplemental Information 1 [file peerj-09-12207-s001.xlsx]

## Sheet: CABG
order	age	male-M/female-K	Body weight [kg]	Body height [m]	BMI	BMI [kg/m2] Underweight Normal Overweight Obese	Tobacco smoking No-0 Yes-1	Diabetes mellitus (DM) No-0 Yes-1	Hypertension (HT) No-0 Yes-1	RR (systolic)	RR (diastolic)	Myocardial infarction (MI) No-0 Yes-1	NYHA	NYHA Group 1 (NYHA I and II) Group 2 (NYHA III and IV)	CRP (mg/l)	CRP [mg/L] <0.6 Normal-0 Higher than normal-1	Kreat (mg%)	Creatinine [mg/dL] <1.4 M and <1.2 F Normal-0 Higher than normal-1	Mocznik (mg%)	Urea [mg/dL] <40 Normal-0 Higher than normal-1	TG (mg/dl)	TG [mg/dL] <150 Normal-0 Higher than normal-1 NA	CH (mg/dl)	Total cholesterol [mg/dL] <190 Normal-0 Higher than normal-1 NA	HDL (mg/dl)	HDL [mg/dL] >40 for M, >50 for F Normal-0 Higher than normal-1 NA	LDL (mg/dl)	LDL [mg/dL] <70 Normal-0 Abnormal-1	Mg	Mg 1-less than normal 2-normal 3-higher than normal	Ca	Ca 1-less than normal 2-normal 3-higher than normal	Ca/Mg	Fe	Fe 1-less than normal 2-normal 3-higher than normal	Cu 224.700	Cu 1-less than normal 2-normal 3-higher than normal	Zn	Zn 1-less than normal 2-normal 3-higher than normal	P 178.766 (potassium)	P: 1-less than normal 2-normal 3-higher than normal
181.	75	K	71	1.54	29.9376	3	0	1	1			0	3	2	0.2	0	1	0	34	0	120	0	177	0	48	0	92	1	22.5176	2	134.849	3	5.98861		1	1.44103	2	1.16846	3	258.643	3
185.	79	M	63	1.8	19.4444	2	0	0	1			0	3	2	12.5	1	2.09	1	54	1									16.2022	1	92.9143	2	5.73468	0.510307	2	1.25402	2	0.624194	1	269.607	3
9.	70	M	87	1.7	30.1038	4	0	1	0	125	75	1	2	1	81.7	1	1.6	1	75	1	367.67	1	348.91	1	44.73	1	230.65	1	20.0265	2	85.7057	1	4.27961	0.611937	2	1.42911	2	0.942269	2	145.414	3
59.	56	K	89	1.59	35.2043	4	0	1	1	115	50	1	2	1	31.8	1	4.28	1	119	1	367.67	1	348.91	1	44.73	0	230.65	1	22.4244	2	111.282	3	4.96256	0.737518	2	0.95841	2	1.34331	3	339.012	3
75.	52	M	102	1.84	30.1276	4	0	0	1	120	70	1	1	1	2.2	0	1.05	0	38	0									15.4917	1	72.1918	1	4.66002	0.845362	2	0.363674	1	0.908022	2	212.897	3
43.	77	K	79	1.64	29.3724	3	0	1	1	130	75	0	2	1	1.2	0	1.13	0	71	1									13.4033	1	85.6707	1	6.39176	0.923599	2	0.431213	1	1.57404	3	187.675	3
160.	71	M	69	1.69	24.1588	2	0	0	1			1	3	2	17.5	1	0.88	0	49	1	146	0	195	1	25	0	48	0	19.5736	1	106.25	3	5.42824	0.945751	2	1.80202	3	1.44798	3	185.638	3
19.	64	M	92	1.83	27.4717	3	0	0	1	90	60	0	3	2	16	1	1.25	0	67	1									15.2367	1	74.6397	1	4.89867	0.967816	2	0.933499	2	1.25048	3	176.584	3
51.	72	M	71	1.66	25.7657	3	0	1	1	115	65	0	2	1	4.6	0	0.73	0	36	0	81	0	145	0					15.6111	1	78.3278	1	5.01743	0.974845	2	0.339707	1	1.32323	3	190.339	3
57.	71	M	109	1.7	37.7163	4	0	1	1	105	60	1	3	2	6.2	1	2.03	1	82	1	202	1	106	0	23.32	0	42	0	18.3886	1	80.0063	1	4.35087	0.996783	2	0.597636	1	1.54634	3	193.303	3
81.	66	M	85	1.68	30.1162	4	0	0	1	130	70	0	3	2	11.1	1	0.83	0	45	1	130	0	144	0	39	0	93	1	15.4817	1	75.5413	1	4.87939	1.04557	2	0.535092	1	1.1285	2	189.479	3
1.	68	M	75	1.7	25.9516	3	0	1	0	100	65	0	2	1	1.5	0	0.91	0	41	1									20.4439	2	81.0475	1	3.96439	1.05209	2	0.334574	1	1.1505	3	77.7914	3
38.	59	M	82	1.68	29.0533	3	0	0	1	100	50	0	2	1	1.2	0	0.86	0	44	1									19.7618	1	81.1836	1	4.10811	1.05264	2	0.871564	2	1.87053	3	177.475	3
56.	65	M	75	1.61	28.9341	3	0	1	1	150	70	0	2	1	0.8	0	1.85	1	75	1			365	1					13.538	1	82.3869	1	6.08559	1.05425	2	0.410668	1	1.32382	3	235.203	3
45.	77	K	63	1.57	25.5588	3	1	0	1	110	70	0	3	2	5.5	1	0.72	0	21	0									19.7692	1	89.5433	1	4.52943	1.07372	2	0.909138	2	1.56976	3	213.63	3
9.	64	M	96.2	1.69	33.6823	4	0	0	1	100	70	0	3	2	15.2	1	0.78	0	42	1									20.0841	2	82.4157	1	4.10354	1.07813	2	0.880737	2	1.57754	3	184.35	3
77.	66	K	69	1.49	31.0797	4	0	0	0	90	60	1	1	1	4.5	0	0.86	0	22	0									18.6474	1	87.7996	1	4.7084	1.10867	2	0.445418	1	3.19351	3	218.761	3
49.	57	M	91	1.7	31.4879	4	0	0	1	110	60	1	2	1	4.1	0	0.73	0	28	0									18.0141	1	74.4215	1	4.13129	1.1171	2	0.397532	1	1.63771	3	212.391	3
47.	66	M	80	1.75	26.1224	3	0	1	1	120	60	0	3	2	0.2	0	0.82	0	44	1									15.9587	1	65.6793	1	4.11559	1.12438	2	0.7	1	1.35563	3	144.83	3
175.	66	K	63	1.46	29.5553	3	1	0	0			1	2	1	1	0	0.71	0	30	0	214	1	164	0	52.7	1	92	1	23.3375	2	112.617	3	4.82557	1.12827	2	1.42384	2	1.04487	2	253.746	3
88.	66	M	99	1.65	36.3636	4	0	1	1	120	70	1	2	1	0.2	0	0.82	0	42	1	134.1	0	213	1	34.1	0	152.48	1	11.1209	1	71.7627	1	6.45294	1.15922	2	0.314456	1	1.10697	2	189.815	3
167.	77	M	95	1.74	31.378	4	0	0	0	105	60	0	3	2	1.5	0	0.82	0	36	0	64	0	246	1	59.1	1	176	1	24.6645	2	115.99	3	4.70273	1.16422	2	1.86193	3	1.09511	2	237.612	3
34.	58	M	80	1.67	28.6851	3	0	0	0	90	60	0	2	1	0.7	0	0.9	0	29	0	367.67	1	348.91	1	44.73	1	230.65	1	19.2422	1	95.0448	2	4.9394	1.17187	2	0.671997	1	2.36691	3	290.812	3
66.	70	M	92	1.9	25.4848	3	1	0	1	100	60	0	2	1	1.3	0	0.78	0	27	0									16.5611	1	84.273	1	5.08861	1.18078	2	2.45893	3	4.01911	3	222.739	3
78.	68	M	98	1.7	33.91	4	0	1	1	110	60	0	2	1	4	0	1.06	0	35	0									16.1268	1	87.2069	1	5.40759	1.18597	2	0.382712	1	2.2377	3	236.927	3
62.	47	M	99	1.67	35.4979	4	1	1	1	115	70	0	3	2	1.5	0	1.24	0	43	1									16.7784	1	87.8031	1	5.23309	1.22785	2	0.673684	1	1.25765	3	226.094	3
70.	82	K	63	1.63	23.7118	2	0	0	1			1	2	1	1.1	0	0.96	0	51	1									20.2695	2	83.2905	1	4.10915	1.24989	2	0.699466	1	1.11216	2	261.17	3
12.	63	K	47	1.5	20.8889	2	0	0	1			0	3	2	18.6	1	1.12	0	81	1	61.5	0	150	0	33	0	104.5	1	19.8088	1	80.7322	1	4.07557	1.25673	2	1.34814	2	1.18367	3	250.048	3
7.	68	K	75	1.64	27.8852	3	0	0	1	125	75	0	2	1	100.5	1	0.69	0	51	1			200	1			90	0	19.176	1	85.4932	1	4.45835	1.27677	2	0.644771	1	1.23841	3	215.779	3
13.	78	K	68	1.58	27.2392	3	0	1	1	120	70	0	3	2	0.8	0	0.92	0	33	0	71.32	0	179.26	0					9.05586	1	93.4976	2	10.3245	1.29265	2	0.584885	1	1.14099	2	210.679	3
55.	60	M	142.6	1.78	45.0069	4	0	0	1	140	80	1	3	2	2.2	0	0.86	0	41	1									14.8088	1	70.6679	1	4.77203	1.29754	2	0.336676	1	1.62237	3	186.448	3
42.	53	M	113.5	1.78	35.8225	4	1	0	1	110	70	0	2	1	1.1	0	0.91	0	36	0									17.7817	1	78.4664	1	4.41276	1.31212	2	0.12058	1	2.1259	3	202.96	3
3.	41	K	83	1.52	35.9245	4	0	0	1	125	75	0	3	2	5.1	1	0.77	0	20	0									18.9726	1	88.3912	1	4.65889	1.31547	2	0.869687	2	1.44491	3	179.959	3
169.	59	M	83.36	1.82	25.166	3	1	0	1	100	64	1	2	1	1.2	0	0.97	0	34	0	119	0	140	0	50.4	1	84	1	23.2541	2	120.029	3	5.16164	1.31982	2	1.28579	2	1.24936	3	234.408	3
11.	71	K	94	1.53	40.1555	4	0	0	1	100	60	0	3	2	4.9	0	0.77	0	40	0									18.0421	1	97.9419	2	5.42852	1.33761	2	0.932703	2	1.6331	3	251.296	3
72.	74	M	80	1.65	29.3848	3	0	0	1	100	65	1	1	1	0.3	0	0.87	0	38	0	154	1	186	0					17.7125	1	78.283	1	4.41964	1.3427	2	0.560873	1	1.20568	3	196.81	3
29.	71	K	70	1.52	30.2978	4	0	1	1	110	55	0	3	2	2.6	0	0.75	0	26	0	188	1	220	1	66	1	114	1	19.3463	1	113.841	3	5.88436	1.35326	2	1.37643	2	1.34801	3	183.511	3
5.	51	M	89	1.79	27.7769	3	1	0	0	110	60	0	2	1	0.9	0	0.96	0	46	1	81	0	222	1	149	1	61	0	18.5155	1	93.0984	2	5.02814	1.35832	2	0.525503	1	2.09829	3	196.238	3
15.	55	M	54	1.68	19.1327	2	1	0	0	100	60	0	2	1	18.8	1	0.76	0	21	0	78.77	0	162.61	0	58.16	1	88.7	0	13.0011	1	62.2785	1	4.79024	1.38152	2	0.313757	1	1.02434	2	133.491	3
7.	74	K	72	1.52	31.1634	4	0	1	1	130	70	1	2	1	1.1	0	0.7	0	45	1	149	0	153.1	0	55.52	1	67.78	0	11.288	1	86.667	1	7.6778	1.38638	2	0.486356	1	1.31574	3	149.6	3
144.	48	M	128	1.76	41.3223	4	1	1	1	120	70	1	2	1	6.8	1	0.87	0	29	0	198.32	1	188.81	0	49.1	1	100.04	1	27.7652	3	126.775	3	4.56598	1.38928	2	2.19219	3	2.41693	3	138.742	3
58.	65	M	92	1.73	30.7394	4	0	1	1			1	3	2	1	0	0.92	0	39	0									15.383	1	87.1612	1	5.66606	1.39721	2	0.29485	1	1.74237	3	249.49	3
90.	59	M	100	1.66	36.2897	4	1	1	1	110	60	1	2	1	1	0	0.77	0	26	0	367.67	1	348.91	1	44.73	1	230.65	1	18.2705	1	88.7637	1	4.85831	1.41535	2	0.446576	1	1.09346	2	280.405	3
4.	67	K	68	1.53	29.0487	3	0	0	1	140	70	0	3	2	3.01	0	1.1	0	37	0	185	1	138	0	44	0	57	0	15.8487	1	73.2769	1	4.62354	1.42115	2	0.773217	2	1.64265	3	177.65	3
31.	62	M	72	1.7	24.9135	2	0	0	1			1	2	1	68.8	1	1.05	0	58	1									18.6692	1	83.9329	1	4.49579	1.4296	2	0.740838	1	2.03715	3	185.781	3
22.	62	M	74	1.75	24.1633	2	1	0	1	115	60	1	2	1	0.5	0	0.78	0	18	0									18.6731	1	91.8717	2	4.92001	1.44457	2	0.68852	1	1.90741	3	172.693	3
162.	67	K	102	1.56	41.9132	4	0	0	1	100	60	0	3	2	7.5	1	0.81	0	30	0	172	1	234	1	50	1	202	1	22.6955	2	117.489	3	5.17677	1.45522	2	1.3108	2	1.51338	3	248.865	3
87.	67	M	88	1.73	29.4029	3	0	0	1	115	70	0	1	1	1.8	0	0.75	0	30	0	160	1	200	1			110	1	20.252	2	97.4775	2	4.81324	1.45997	2	0.508255	1	2.97741	3	293.546	3
11.	69	K	71	1.6	27.7344	3	0	0	1	130	80	1	1	1	5.7	1	1	0	52	1	129	0	227.54	1	52.13	1	149.61	1	19.0712	1	86.414	1	4.53111	1.46774	2	0.891572	2	1.32621	3	151.347	3
180.	71	K	88.2	1.55	36.7118	4	0	0	1	120	75	0	1	1	1	0	0.8	0	37	0			300	1					21.3851	2	108.724	3	5.08412	1.46871	2	1.154	2	1.63405	3	276.864	3
86.	62	K	44	1.43	21.5169	2	1	0	1	140	80	0	3	2	2.4	0	0.9	0	36	0									20.0061	2	90.7119	2	4.5342	1.47705	2	0.864003	2	1.81778	3	280.916	3
16.	64	K	81	1.52	35.0589	4	0	1	1	110	60	0	2	1	13.1	1	1.11	0	40	0	273.1	1	276.3	1			179.8	1	21.3441	2	91.5039	2	4.28709	1.47737	2	0.747983	1	1.41097	3	175.47	3
5.	66	M	79	1.68	27.9904	3	0	0	0	95	50	0	4	2	4.6	0	0.76	0	27	0									18.2754	1	74.0898	1	4.05408	1.50584	2	0.736448	1	1.38063	3	119.1	3
6.	67	K	60	1.58	24.0346	2	0	0	1	110	60	0	2	1	2.5	0	0.75	0	38	0									18.1144	1	83.7386	1	4.62276	1.50731	2	0.710278	1	1.09038	2	122.867	3
65.	71	M	97	1.67	34.7807	4	0	1	1			1	2	1	0.8	0	1.73	1	52	1									16.286	1	84.1447	1	5.16667	1.51263	2	0.266494	1	1.3731	3	211.702	3
182.	64	M	80.5	1.66	29.2132	3	1	0	0	100	60	0	2	1	9	1	0.82	0	26	0									23.715	2	113.848	3	4.80065	1.51584	2	1.91767	3	1.56756	3	290.139	3
184.	65	M	95	1.7	32.872	4	0	1	1	110	70	1	2	1	2.4	0	0.88	0	48	1									23.6939	2	119.465	3	5.04204	1.52698	2	1.47072	2	1.85272	3	249.758	3
2.	76	K	67.7	1.6	26.4453	3	0	0	1	170	60	0	3	2	4.7	0	1.06	0	45	1			155.02	0					17.5445	1	75.8359	1	4.32248	1.52741	2	0.585578	1	1.23465	3	129.005	3
71.	70	M	98	1.76	31.6374	4	1	0	1	120	70	0	3	2	2.1	0	0.82	0	41	1	213	1	203	1	51	1	109	1	15.1269	1	96.2263	2	6.36126	1.5312	2	0.383713	1	4.29811	3	177.974	3
170.	71	K	80	1.58	32.0461	4	0	1	1	145	75	1	2	1	9.5	1	0.94	0	42	1	178	1	219	1	48	0	132	1	19.7262	1	123.989	3	6.28546	1.53263	2	2.0182	3	1.51334	3	243.114	3
35.	70	M	69	1.7	23.8754	2	1	0	1	110	60	1	2	1	4.7	0	0.87	0	32	0	37	0	175	0	91	1	77	1	17.1821	1	81.7346	1	4.75697	1.54378	2	0.420063	1	2.88059	3	181.479	3
138.	67	M	68	1.68	24.093	2	0	0	0	130	70	1	3	2	1.7	0	0.86	0	49	1	217	1	297	1	59.5	1	245	1	20.1002	2	115.352	3	5.73885	1.56246	3	1.27768	2	1.11537	2	196.143	3
19.	64	M	97	1.82	29.2839	3	0	1	1	90	60	0	2	1	1.4	0	0.81	0	40	0	157.8	1	150	0	51.2	1	67.24	0	19.7591	1	86.4426	1	4.37482	1.58043	3	0.486295	1	1.34579	3	183.778	3
30.	72	K	73	1.54	30.7809	4	0	1	1	120	60	1	3	2	0.6	0	0.62	0	30	0	154	1	135	0	54.9	1	69	0	21.4198	2	96.7824	2	4.51836	1.58592	3	0.671493	1	1.92258	3	215.119	3
27.	58	M	56	1.66	20.3223	2	1	0	0	110	80	0	2	1	1.7	0	0.74	0	16	0									18.4508	1	85.861	1	4.6535	1.59034	3	0.745045	1	1.36045	3	195.297	3
76.	79	K	78	1.53	33.3205	4	0	1	1	90	60	1	3	2	6.4	1	0.82	0	42	1	189	1	138.05	0	66.13	1	54.14	0	15.6393	1	78.3952	1	5.01271	1.59307	3	0.416969	1	1.04863	2	216.055	3
146.	71	M	116	1.76	37.4483	4	0	1	1			1	3	2	6	1	1.71	1	92	1	82	0	134	0	32	0	85	1	18.8418	1	98.6933	2	5.23799	1.60864	3	1.25454	2	1.4156	3	127.772	3
22.	63	M	65	1.66	23.5883	2	0	0	0			0	2	1	4.9	0	3.2	1	149	1									20.4365	2	88.8379	1	4.34703	1.61118	3	0.763717	2	1.2309	3	330.948	3
118.	63	M	57.5	1.59	22.7444	2	1	0	0	139	65	0	3	2	29.5	1	1.22	0	53	1									21.4996	2	116.161	3	5.40293	1.6112	3	1.24501	2	0.824987	2	129.506	3
183.	60	M	79.5	1.77	25.3758	3	1	0	1	100	50	0	3	2	1.4	0	0.86	0	50	1	49	0	191	1	75	1	106	1	21.6792	2	104.76	3	4.83228	1.63097	3	1.33893	2	1.19493	3	216.059	3
178.	63	M	94	1.71	32.1466	4	0	1	1	120	60	0	2	1	1.2	0	0.84	0	53	1	134.1	0	213	1	34.1	0	152.48	1	25.0403	3	119.234	3	4.76169	1.64863	3	1.39258	2	1.19821	3	236.355	3
21.	64	M	73	1.69	25.5593	3	0	0	1			1	1	1	10.3	1	1.86	1	106	1									15.2054	1	93.6821	2	6.16111	1.65403	3	0.975676	2	1.13463	2	216.414	3
30.	58	M	64	1.7	22.1453	2	1	0	1	120	80	0	2	1	8.2	1	0.85	0	37	0									20.145	2	101.267	2	5.02693	1.65621	3	1.64002	2	1.13273	2	171.846	3
2.	69	M	76	1.69	26.6097	3	0	0	1	140	80	1	3	2	0.4	0	0.9	0	24	0									21.1534	2	91.7308	2	4.33645	1.6671	3	0.277265	1	1.21446	3	109.155	3
16.	62	K	54	1.56	22.1893	2	0	0	0			0	2	1	0.5	0	0.68	0	28	0									16.8844	1	76.8244	1	4.55003	1.66865	3	0.421324	1	1.23995	3	242.879	3
92.	61	M	95	1.73	31.7418	4	1	0	0	95	70	1	1	1	8	1	0.88	0	35	0									19.0974	1	81.6582	1	4.27587	1.67705	3	0.61685	1	1.25227	3	246.74	3
171.	56	K	62	1.59	24.5243	2	1	0	1	150	70	0	3	2	0.4	0	0.91	0	39	0	100	0	161	0	41	0			20.1735	2	114.01	3	5.65145	1.68617	3	1.49989	2	1.77533	3	223.319	3
48.	57	M	79	1.65	29.0174	3	0	1	1	100	60	1	3	2	2.6	0	0.85	0	30	0									15.9309	1	104.352	3	6.55027	1.69342	3	0.413664	1	2.25883	3	239.558	3
36.	72	M	96	1.7	33.218	4	0	1	1	140	70	0	3	2	3.7	0	0.97	0	44	1									17.7396	1	85.9718	1	4.84633	1.69537	3	0.631293	1	1.60479	3	187.303	3
8.	81	K	74	1.58	29.6427	3	0	0	1	120	80	0	2	1	2.1	0	0.74	0	37	0									29.5109	3	116.568	3	3.94999	1.70079	3	1.32708	2	1.7744	3	284.829	3
165.	44	M	102.5	1.79	31.9903	4	1	1	1	120	80	0	2	1	1.8	0	1.04	0	41	1	131	0	147	0	35	0	85	1	26.777	3	129.973	3	4.85392	1.71106	3	1.64627	2	1.65662	3	217.212	3
159.	66	M	75	1.61	28.9341	3	1	0	0	90	65	0	3	2	2.9	0	0.85	0	21	0	171	1	242	1	50	1	158	1	19.8438	1	105.414	3	5.31219	1.71283	3	1.29569	2	1.10076	2	218.417	3
33.	60	K	96	1.67	34.4222	4	0	1	1	100	60	0	3	2	2.6	0	0.84	0	32	0	129	0	144.4	0	40.4	0	95.4	1	21.0999	2	111.621	3	5.29011	1.71551	3	0.881292	2	4.98883	3	266.814	3
161.	66	M	80	1.62	30.4832	4	1	0	1	110	60	0	2	1	1.8	0	0.84	0	35	0	104	0	185	0	33.1	0	51	0	19.6696	1	115.69	3	5.88168	1.72381	3	1.03575	2	1.9458	3	196.758	3
148.	70	M	104	1.83	31.055	4	0	0	1	125	80	0	1	1	2.1	0	1.99	1	73	1							50	0	25.1165	3	106.004	3	4.22051	1.73053	3	1.35039	2	1.24721	3	133.97	3
84.	77	M	80	1.64	29.7442	3	1	0	1	100	70	0	2	1	0.8	0	0.8	0	41	1									16.8675	1	78.3801	1	4.64681	1.73104	3	0.54048	1	1.08424	2	256.131	3
80.	66	M	88	1.7	30.4498	4	0	0	0	100	80	0	1	1	0.2	0	0.81	0	32	0									16.7671	1	74.5547	1	4.44648	1.73749	3	0.290783	1	1.1162	2	218.084	3
52.	75	K	75	1.49	33.7823	4	0	0	1	115	65	1	2	1	1	0	0.77	0	12.9	0									18.6995	1	94.011	2	5.02746	1.7591	3	0.589696	1	2.45452	3	239.517	3
177.	68	M	88	1.79	27.4648	3	0	1	1	90	60	1	2	1	1.1	0	0.9	0	38	0			400	1					23.0268	2	105.731	3	4.59165	1.76166	3	0.926883	2	1.12223	2	233.505	3
82.	58	M	98	1.78	30.9304	4	0	1	1	120	80	0	2	1	5.2	1	0.92	0	40	0	156	1	176	0	44.4	1	117	1	17.9925	1	81.3437	1	4.52097	1.77053	3	0.757494	2	1.29168	3	188.749	3
121.	58	M	83.5	1.71	28.5558	3	1	1	0	125	80	1	2	1	2.1	0	1.11	0	27	0									19.8132	1	130.84	3	6.60368	1.77827	3	1.30837	2	2.78642	3	168.755	3
28.	70	M	96	1.78	30.2992	4	0	0	1	90	60	1	2	1	0.6	0	0.98	0	39	0									15.0049	1	128.228	3	8.54575	1.77938	3	0.266645	1	9.3831	3	151.714	3
64.	50	M	97	1.63	36.5087	4	0	0	0	105	70	1	4	2	3.2	0	0.81	0	31	0	258.38	1	196.06	1	19.14	0	125.24	1	14.9068	1	74.6573	1	5.00829	1.78169	3	0.245847	1	1.76046	3	284.814	3
21.	79	K	63	1.59	24.9199	2	1	1	1	125	70	0	3	2	2.9	0	0.76	0	48	1	57	0	171	0	89	1	71	0	16.6765	1	78.2218	1	4.69054	1.79343	3	0.534526	1	0.978801	2	262.944	3
1.	79	M	97	1.68	34.3679	4	0	0	0	110	70	1	3	2	31.6	1	1.04	0	36	0									22.3663	2	88.9139	1	3.97536	1.79386	3	0.7	1	1.88401	3	95.3381	3
20.	71	K	88	1.65	32.3232	4	1	0	1	120	70	0	2	1	6	1	0.72	0	26	0									26.0895	3	124.896	3	4.78722	1.8005	3	1.23864	2	2.17315	3	227.138	3
188.	62	K	84	1.55	34.9636	4	1	1	1			0	2	1	4.4	0	0.6	0	23	0	665	1	235	1	26	0	71	1	17.9764	1	104.246	3	5.79903	1.80466	3	2.29273	3	1.19836	3	305.362	3
17.	72	M	67	1.66	24.3141	2	0	0	1	135	75	0	2	1	0.4	0	0.82	0	42	1	41.9	0	182.7	0	58.2	1	116	1	17.5647	1	81.3449	1	4.63114	1.8101	3	0.479816	1	1.58121	3	223.508	3
174.	78	M	104	1.72	35.1541	4	0	0	1	115	40	0	2	1	1.6	0	0.78	0	30	0	132.86	0	189.48	0	38.67	0	139.21	1	24.8576	2	99.4199	2	3.99958	1.81708	3	1.54	2	1.1113	2	207.149	3
179.	52	M	87	1.64	32.3468	4	1	0	1	112	47	1	2	1	1.6	0	0.81	0	25	0	198.32	1	188.81	0	49.1	1	100.04	1	24.8492	2	120.013	3	4.82965	1.83253	3	1.69836	3	1.48447	3	384.744	3
54.	81	K	71	1.63	26.7229	3	0	1	1	130	55	1	2	1	1	0	0.8	0	54	1									15.6666	1	84.4636	1	5.39133	1.846	3	0.0218271	1	1.31836	3	236.895	3
17.	76	M	82	1.73	27.3982	3	0	1	0	110	80	0	1	1	0.4	0	0.94	0	38	0	162	1	200	1	45	1	139	1	19.9987	2	89.4716	1	4.47388	1.84758	3	0.498062	1	1.38009	3	166.318	3
18.	64	K	65	1.53	27.7671	3	1	0	1	105	60	1	2	1	3.3	0	0.68	0	29	0	106.34	0	183.87	0					18.1341	1	84.7146	1	4.67156	1.86254	3	0.616244	1	1.48767	3	222.791	3
113.	74	M	74	1.74	24.4418	2	0	0	1	115	70	0	1	1	1.2	0	1.48	1	54	1	172	1	234	1	50	1	202	1	22.55	2	109.982	3	4.87728	1.86534	3	0.804016	2	1.75376	3	114.433	3
60.	78	M	64	1.73	21.3839	2	0	0	0	37	41	0	2	1	6.4	1	1.59	1	78	1									17.8025	1	71.3197	1	4.00616	1.86757	3	0.86306	2	1.53104	3	172.434	3
166.	63	M	98	1.74	32.3689	4	0	1	1	125	85	1	2	1	1.5	0	1	0	33	0	468	1	309	1	38.6	0	221	1	27.1284	3	132.715	3	4.89212	1.868	3	1.84786	3	1.46876	3	309.934	3
187.	48	M	96	1.7	33.218	4	1	0	0	110	70	1	2	1	0.8	0	0.76	0	24	0	177	1	256	1	41.9	1	201	1	20.7329	2	95.4803	2	4.60526	1.87476	3	0.908651	2	1.48768	3	217.973	3
154.	64	M	100	1.83	29.8606	3	1	0	1			0	2	1	4.2	0	0.65	0	29	0									22.6083	2	109.357	3	4.83702	1.87615	3	1.55198	2	1.26824	3	221.247	3
125.	63	M	105	1.78	33.1398	4	1	1	1	155	80	1	1	1	1.7	0	0.85	0	22	0	134	0	101.8	0	35.6	0	54	0	17.7672	1	117.289	3	6.60145	1.88014	3	0.725677	1	0.918567	2	176.993	3
15.	69	K	73	1.59	28.8754	3	0	1	1	120	70	1	2	1	5.6	1	7.56	1	84	1	140	0	181	0	62.4	1	103	1	17.3307	1	78.1069	1	4.50686	1.98976	3	0.976901	2	1.47596	3	183.875	3
168.	75	M	100	1.67	35.8564	4	0	1	1	140	70	0	3	2	1.6	0	1.32	0	50	1									20.1821	2	103.859	3	5.14609	1.99608	3	1.43113	2	1.11068	2	203.363	3
153.	67	K	71	1.57	28.8044	3	0	0	1	110	65	1	1	1	1.2	0	0.93	0	48	1	342	1	367	1	45.7	0	306	1	22.0129	2	102.177	3	4.6417	1.99888	3	1.43321	2	1.10379	2	165.246	3
46.	46	M	104	1.71	35.5665	4	0	0	1	110	60	1	2	1	8.3	1	0.98	0	41	1	190	1	189.5	0	69.2	1	129	1	7.14687	1	28.7804	1	4.02699	1.9993	3	0.7	1	0.743093	2	64.6887	3
67.	80	M	90	1.72	30.4218	4	0	1	1			1	4	2	4.5	0	0.87	0	28	0									17.6951	1	103.853	3	5.86905	2.00456	3	0.87213	2	3.34051	3	225.042	3
44.	70	M	90	1.76	29.0548	3	1	0	1	120	70	0	3	2	1.3	0	0.87	0	41	1									22.2396	2	99.6315	2	4.47992	2.01964	3	0.464787	1	1.72078	3	278.392	3
53.	58	M	86	1.7	29.7578	3	0	1	1	110	60	0	2	1	1.1	0	1.26	0	7.5	0	180.82	1	194.82	1	69.87	1	112.69	1	16.468	1	78.2434	1	4.75124	2.02214	3	0.429164	1	1.40455	3	215.009	3
172.	68	M	86	1.75	28.0816	3	1	0	0	115	65	0	2	1	0.9	0	0.94	0	41	1	135	0	109	0	51	1	31	0	20.0558	2	96.4034	2	4.80677	2.03116	3	1.12692	2	1.47474	3	181.696	3
142.	57	M	85	1.69	29.7609	3	0	0	0	110	50	0	2	1	4.6	0	1.06	0	37	0									16.7697	1	85.0584	1	5.07214	2.06325	3	0.916775	2	0.938833	2	164.301	3
163.	54	M	89	1.8	27.4691	3	0	1	1	112	10?	1	2	1	0.9	0	1.09	0	35	0	145	0	268	1	41.8	1	211	1	21.8715	2	106.834	3	4.8846	2.08405	3	1.28684	2	1.44236	3	171.963	3
32.	56	M	90	1.81	27.4717	3	1	1	1	100	60	1	3	2	1.4	0	0.78	0	31	0	117	0	183	0	36	0	123	1	22.5692	2	97.8277	2	4.33457	2.09655	3	0.661462	1	1.9381	3	209.146	3
4.	70	K	67	1.58	26.8386	3	0	0	1	140	80	0	2	1	1.1	0	0.82	0	42	1	101	0	143	0	60	1	78	1	19.0949	1	90.8891	2	4.75987	2.12047	3	0.670884	1	2.38321	3	128.239	3
129.	69	M	102	1.83	30.4578	4	0	1	1			1	1	1	0.4	0	0.99	0	31	0	109	0	149	0	42.3	1	95	1	21.983	2	125.421	3	5.70534	2.15491	3	0.785801	2	5.06637	3	138.952	3
133.	67	M	82	1.76	26.4721	3	1	0	0	140	70	1	1	1	11.4	1	0.78	0	22	0									20.6674	2	112.032	3	5.4207	2.1551	3	1.28209	2	1.3956	3	148.931	3
155.	68	M	80	1.76	25.8264	3	1	1	1			1	2	1	0.2	0	0.88	0	33	0	125.8	0	197	1	47.3	1	128.8	1	23.3694	2	104.145	3	4.45648	2.16884	3	1.42748	2	1.27298	3	167.294	3
158.	79	M	84	1.75	27.4286	3	0	1	1	100	60	0	2	1	0.2	0	1.01	0	34	0									17.1664	1	117.14	3	6.82383	2.18144	3	1.24464	2	0.889236	2	146.637	3
23.	55	M	58	1.68	20.5499	2	0	0	0	90	60	0	2	1	1.2	0	0.82	0	17	0									23.7052	2	116.634	3	4.92018	2.19177	3	0.824509	2	5.87353	3	205.096	3
109.	69	K	77	1.64	28.6288	3	1	0	1	110	70	0	1	1	2.2	0	0.99	0	48	1	110.33	0	226.84	1	47.58	0	157.19	1	21.0099	2	119.553	3	5.69033	2.21851	3	1.32352	2	2.11626	3	144.5	3
156.	76	K	84	1.59	33.2265	4	0	0	1	130	70	0	2	1	0.7	0	0.78	0	32	0	143.68	0	131.76	0	35.43	0	84	1	21.2976	2	98.5441	2	4.62699	2.22056	3	1.06232	2	1.63008	3	181.577	3
63.	69	M	84	1.68	29.7619	3	0	1	1	140	90	0	2	1	0.9	0	0.98	0	28	0	144	0	175	0	40.8	1	60	0	17.7736	1	86.6181	1	4.87343	2.22742	3	0.35716	1	1.36332	3	215.102	3
24.	71	M	92	1.7	31.8339	4	0	1	1	140	80	0	2	1	2.9	0	0.75	0	45	1	108	0	184	0	54	1	168	1	15.9378	1	87.8539	1	5.51229	2.23147	3	0.370264	1	3.463	3	190.713	3
25.	62	K	105	1.64	39.0393	4	0	0	0	110	50	0	2	1	1.6	0	0.9	0	44	1	159	1	246.81	1	37.67	0	177.34	1	19.2059	1	100.936	2	5.25548	2.24891	3	0.879171	2	1.05122	2	138.375	3
18.	63	M	69	1.75	22.5306	2	1	1	1	105	60	0	3	2	0.8	0	0.76	0	30	0									20.5661	2	96.5616	2	4.69518	2.25128	3	0.52689	1	1.15292	3	306.467	3
61.	73	M	83	1.69	29.0606	3	1	0	1	130	75	0	2	1	59.9	1	0.78	0	30	0									21.8353	2	96.6094	2	4.42446	2.27289	3	0.741911	1	1.19023	3	281.627	3
69.	64	M	89	1.76	28.7319	3	0	1	1	90	60	1	1	1	0.2	0	0.71	0	27	0	238	1	146	0	29	0	71	1	15.7163	1	94.156	2	5.99099	2.27736	3	0.217288	1	4.05689	3	199.869	3
74.	64	M	80	1.7	27.6817	3	0	0	1	110	60	0	1	1	0.8	0	0.98	0	43	1									16.8315	1	76.4934	1	4.54466	2.30021	3	0.42855	1	1.15893	3	224.832	3
112.	64	M	71	1.7	24.5675	2	0	0	1			1	2	1	0.5	0	0.87	0	38	0	146	0	190	0	53.1	1	37.4	0	24.943	2	117.515	3	4.71136	2.3035	3	1.11497	2	1.5698	3	136.9	3
93.	84	M	87	1.69	30.4611	4	0	1	1			0	2	1	4.5	0	1.32	0	56	1			140	0					33.4942	3	137.612	3	4.10855	2.30409	3	0.914049	2	2.22249	3	469.95	3
83.	61	M	69	1.67	24.7409	2	0	0	0	105	60	0	1	1	0.7	0	0.7	0	39	0			240	1			255.2	1	16.5052	1	79.0907	1	4.79188	2.35005	3	0.408767	1	1.18193	3	237.202	3
141.	59	M	81	1.7	28.0277	3	1	0	1	130	80	1	1	1	0.2	0	1.06	0	35	0									23.0493	2	114.517	3	4.96835	2.36772	3	0.794808	2	1.15877	3	149.89	3
107.	71	K	89	1.58	35.6513	4	1	1	1			0	1	1	2.7	0	0.67	0	53	1									19.2079	1	103.237	3	5.37468	2.39383	3	1.21933	2	1.03412	2	116.316	3
123.	78	M	104	1.75	33.9592	4	1	1	1	140	60	1	3	2	2.3	0	0.81	0	47	1			320	1					22.0944	2	111.838	3	5.06184	2.39425	3	0.833108	2	0.941676	2	162.214	3
24.	84	K	68	1.58	27.2392	3	0	1	1	120	70	1	3	2	2	0	1.18	0	47	1									18.2055	1	110.444	3	6.06654	2.39555	3	0.882296	2	3.19216	3	139.91	3
139.	60	M	97	1.72	32.788	4	0	0	1	110	60	0	1	1	4	0	0.89	0	25	0	148	0	180	0	28.7	0	59	0	22.3083	2	126.724	3	5.68058	2.39797	3	0.961371	2	1.18068	3	136.363	3
127.	73	K	73	1.65	26.8136	3	0	1	1	110	70	1	3	2	0.5	0	1.16	0	60	1	180	1	200	1	39.83	0	70.38	1	21.3869	2	127.284	3	5.95149	2.41481	3	0.900596	2	1.21727	3	155.477	3
20.	64	M	64	1.57	25.9645	3	0	0	0	90	75	0	2	1	0.8	0	0.91	0	47	1	92	0	138	0	65	1	54	0	17.1047	1	79.1607	1	4.628	2.44395	3	0.444278	1	1.15142	3	220.635	3
97.	60	M	69	1.69	24.1588	2	0	0	0	115	70	1	2	1	4.8	0	0.73	0	56	1	276	1	197	1	41	1	124	1	24.595	2	104.224	3	4.23762	2.44755	3	0.87594	2	2.07966	3	112.891	3
173.	69	M	83	1.67	29.7608	3	1	0	1	90	50	1	2	1	3.6	0	0.86	0	30	0									22.5376	2	108.817	3	4.82822	2.4525	3	1.4504	2	1.19967	3	266.388	3
186.	66	M	78.5	1.69	27.485	3	1	1	1	120	60	1	2	1	0.3	0	1.02	0	42	1	96.6	0	162.3	0	48.6	1	101.5	1	21.3982	2	105.183	3	4.9155	2.453	3	1.20818	2	1.50277	3	239.842	3
8.	65	M	97	1.68	34.3679	4	0	0	1	125	70	0	2	1	2.7	0	0.76	0	22	0	165	1	151	0					19.654	1	132.819	3	6.75785	2.46756	3	0.756582	2	9.25481	3	156.816	3
157.	60	M	81	1.78	25.565	3	0	0	1	120	60	1	3	2	0.3	0	0.82	0	34	0	105	0	183	0	38	0	124	1	24.6666	2	120.614	3	4.88976	2.47418	3	1.07639	2	1.62359	3	167.227	3
68.	68	M	75	1.72	25.3515	3	0	0	0	105	75	0	3	2	0.3	0	0.8	0	34	0	191	1	222	1			150	1	17.7895	1	82.6833	1	4.64787	2.49058	3	0.150408	1	2.14515	3	235.799	3
151.	69	M	109	1.67	39.0835	4	0	0	1	110	70	0	1	1	1.5	0	0.88	0	45	1	149	0	155	0	31	0	100	1	21.3184	2	102.664	3	4.81573	2.53139	3	0.808114	2	1.4747	3	139.819	3
106.	64	M	86	1.66	31.2092	4	0	0	1	120	65	1	1	1	0.3	0	0.96	0	39	0	217	1	223	1	38	0	143	1	24.2724	2	119.012	3	4.9032	2.53785	3	1.08386	2	2.318	3	119.264	3
89.	56	M	63	1.64	23.4236	2	1	0	0	140	70	0	2	1	7.4	1	0.79	0	41	1									17.9537	1	91.1816	2	5.07872	2.54523	3	0.948866	2	1.64188	3	307.621	3
6.	57	M	99	1.72	33.464	4	0	0	0	110	80	0	3	2	1.2	0	0.68	0	34	0									19.0619	1	80.7128	1	4.23424	2.57974	3	0.426297	1	1.21822	3	214.93	3
99.	87	M	71	1.66	25.7657	3	0	1	0			0	2	1	2.7	0	1.29	0	46	1									25.7754	3	103.671	3	4.02211	2.59334	3	1.27236	2	1.2224	3	112.83	3
95.	65	M	103	1.91	28.2339	3	0	1	1	120	80	1	4	2	1.1	0	0.71	0	28	0									21.1001	2	120.303	3	5.70154	2.60189	3	0.674928	1	5.00695	3	83.5524	3
176.	72	M	87	1.61	33.5635	4	0	0	1	110	60	0	2	1	1.1	0	0.71	0	29	0	198.27	1	194.31	1	49.27	1	137.4	1	23.8136	2	108.85	3	4.57092	2.61415	3	1.37539	2	1.09544	2	208.107	3
100.	67	K	81	1.64	30.116	4	1	1	1	130	80	0	3	2	1.3	0	0.91	0	57	1	166	1	135	0	41.3	0	77	1	21.7342	2	124.532	3	5.72977	2.6778	3	0.966764	2	5.33713	3	128.839	3
14.	58	M	87	1.79	27.1527	3	1	1	1	120	80	0	2	1	2.3	0	0.83	0	42	1	137.4	0	175.6	0	59	1	89.2	0	18.9557	1	81.7148	1	4.31082	2.67833	3	0.670551	1	1.23976	3	235.824	3
23.	69	M	71	1.67	25.4581	3	1	0	1	100	60	0	3	2	1.4	0	0.95	0	31	0									21.5636	2	105.655	3	4.89968	2.70858	3	1.1708	2	0.967746	2	143.938	3
14.	76	K	77	1.5	34.2222	4	0	1	1	100	70	0	2	1	1	0	1.21	0	53	1									16.7299	1	104.079	3	6.22111	2.73102	3	0.941381	2	3.15924	3	192.69	3
10.	84	M	101.5	1.79	31.6782	4	0	0	1	120	70	0	2	1	0.5	0	1.62	1	56	1	98.84	0	172.33	0	45.47	1	111.2	1	20.5768	2	113.086	3	5.49579	2.74462	3	0.7	1	8.67554	3	184.656	3
137.	70	M	93	1.75	30.3673	4	0	1	1	90	60	0	1	1	0.8	0	1.12	0	52	1									21.8543	2	121.058	3	5.53933	2.81186	3	0.875099	2	1.34276	3	156.716	3
114.	66	M	67.7	1.57	27.4656	3	1	0	1	140	85	0	3	2	28	1	0.81	0	43	1									21.6332	2	115.305	3	5.32998	2.81954	3	1.59028	2	2.40485	3	151.142	3
131.	78	M	68	1.64	25.2826	3	0	1	1	120	70	1	1	1	0.4	0	1.15	0	51	1	130	0	158	0	54.3	1	88	1	14.3147	1	112.356	3	7.84901	2.82701	3	0.630919	1	1.2176	3	116.962	3
140.	69	M	100	1.66	36.2897	4	1	0	1	110	70	1	1	1	0.4	0	1.32	0	44	1	134	0	130	0	47	1	69	0	19.8176	1	107.178	3	5.40822	2.85343	3	0.511369	1	0.993813	2	161.14	3
79.	59	M	112	1.83	33.4438	4	0	1	1	105	50	0	2	1	0.2	0	0.9	0	40	0	272	1			35	0	171.6	1	14.1922	1	87.8018	1	6.18664	2.86423	3	0.322681	1	2.2448	3	234.674	3
25.	70	K	53	1.5	23.5556	2	0	0	1	100	40	0	3	2	0.6	0	0.85	0	33	0	73	0	252	1	76.8	1	167	1	20.9626	2	84.0665	1	4.0103	2.91124	3	0.665256	1	1.2812	3	221.345	3
150.	63	M	88	1.76	28.4091	3	1	0	1			0	3	2	5.9	1	1.59	1	63	1			180	0					21.8075	2	113.977	3	5.22652	2.92237	3	1.45718	2	1.2557	3	170.62	3
108.	55	M	69	1.78	21.7776	2	1	0	0	115	70	1	3	2	4.9	0	0.81	0	28	0									20.0049	2	127.694	3	6.38313	2.92661	3	0.960863	2	1.9483	3	119.439	3
143.	62	M	90	1.74	29.7265	3	1	0	1	115	60	0	2	1	3.5	0	0.76	0	29	0	180	1	270	1	45.2	1	120	1	23.99	2	107.126	3	4.46547	2.95216	3	1.72597	3	1.26376	3	136.901	3
145.	65	K	78	1.51	34.209	4	0	1	1	110	70	1	2	1	7.3	1	1.19	0	63	1	134	0	100.9	0	30.6	0	55.3	0	24.5506	2	93.2282	2	3.79738	2.96201	3	1.63533	2	1.56861	3	133.139	3
116.	66	M	60	1.62	22.8624	2	1	0	1	115	75	0	3	2	5	0	0.82	0	38	0	145	0	100.9	0	40.43	1	129	1	20.0615	2	111.379	3	5.5519	2.97246	3	0.955552	2	1.13657	2	123.884	3
105.	65	M	116	1.75	37.8776	4	0	1	1	140	80	0	1	1	2.1	0	0.88	0	41	1									21.5121	2	106.281	3	4.94053	2.9847	3	1.19564	2	1.09943	2	100.518	3
103.	59	M	91	1.79	28.4011	3	1	0	1	110	70	0	2	1	1.1	0	0.85	0	22	0			180	0	70	1	93	1	24.3739	2	108.749	3	4.46169	2.99186	3	1.03248	2	1.24223	3	120.583	3
128.	59	K	60	1.7	20.7612	2	1	0	1			0	3	2	1.5	0	0.59	0	22	0	146	0	195	1	25	0	48	0	17.7054	1	119.483	3	6.74839	2.99737	3	1.40022	2	1.5674	3	192.991	3
73.	65	M	58	1.66	21.048	2	1	1	1	130	70	0	3	2	1.2	0	0.98	0	34	0									17.7328	1	88.7599	1	5.0054	3.06212	3	0.0475783	1	3.90482	3	263.73	3
124.	59	M	85	1.69	29.7609	3	1	0	1	130	70	1	2	1	7.7	1	1.11	0	60	1	140	0	175	0	50	1	112	1	21.5849	2	112.83	3	5.22726	3.07956	3	1.03514	2	1.0912	2	154.91	3
104.	76	M	68	1.6	26.5625	3	0	0	1	130	75	0	2	1	3.2	0	0.92	0	47	1	166	1	152	0	49	1	81	1	22.0054	2	110.116	3	5.00405	3.12466	3	0.93614	2	1.26231	3	118.233	3
85.	62	M	81	1.82	24.4536	2	1	0	0	110	65	1	2	1	6.7	1	0.81	0	33	0	160	1	152.6	0	49	1	93	1	16.8705	1	78.6688	1	4.66311	3.13749	3	0.331036	1	2.06327	3	180.407	3
126.	63	M	88	1.73	29.4029	3	0	0	1	140	85	0	2	1	1	0	0.94	0	33	0			283	1					20.5164	2	115.013	3	5.60589	3.15668	3	1.02509	2	1.20315	3	147.838	3
94.	60	K	66	1.58	26.4381	3	1	0	1	100	70	0	2	1	1.1	0	0.83	0	32	0	280	1	324	1	38	0	197	1	18.8982	1	167.077	3	8.8409	3.17492	3	0.838494	2	8.27706	3	83.3084	3
12.	74	M	84	1.71	28.7268	3	0	0	1	120	70	0	2	1	1.1	0	0.97	0	44	1									21.3383	2	81.7882	1	3.83294	3.20913	3	0.521908	1	1.22315	3	152.896	3
37.	50	M	75	1.82	22.6422	2	1	0	1			1	3	2	17	1	0.97	0	57	1									21.8003	2	107.545	3	4.93317	3.30004	3	1.06594	2	4.33443	3	299.074	3
110.	69	K	69	1.56	28.3531	3	0	0	1	110	70	1	1	1	1.4	0	0.81	0	52	1	140	0	264	1	60	1	176	1	24.0566	2	107.299	3	4.46026	3.4023	3	1.25035	2	1.60665	3	143.16	3
96.	58	M	92	1.76	29.7004	3	0	0	0	140	80	0	3	2	1.4	0	1.06	0	34	0									22.8366	2	104.521	3	4.57691	3.4461	3	0.988398	2	2.69279	3	110.602	3
115.	66	M	85	1.65	31.2213	4	0	0	1	100	60	1	1	1	3	0	0.86	0	25	0	142	0	250	1	43.4	1	214	1	22.2615	2	115.539	3	5.1901	3.49885	3	1.00976	2	0.955597	2	129.217	3
29.	62	K	67	1.51	29.3847	3	0	0	0	105	50	1	2	1	0.9	0	0.64	0	22	0									21.3266	2	106.792	3	5.00747	3.50539	3	0.813369	2	4.32965	3	259.342	3
130.	59	M	86	1.67	30.8365	4	0	0	1			0	2	1	5.6	1	0.81	0	51	1									22.2901	2	120.946	3	5.42602	3.60553	3	1.13613	2	3.85896	3	218.841	3
26.	59	K	81	1.58	32.4467	4	0	1	1	100	60	0	2	1	0.6	0	1.03	0	45	1	226	1	221	1					20.6488	2	117.933	3	5.71138	3.63402	3	0.897024	2	1.31379	3	179.14	3
132.	75	M	75	1.67	26.8923	3	0	0	1	130	70	0	2	1	1.4	0	1	0	32	0	276	1	197	1	41	1	124	1	19.2449	1	119.999	3	6.23535	3.78719	3	0.821975	2	1.17538	3	189.279	3
149.	71	M	75	1.65	27.5482	3	1	0	1	110	70	0	3	2	4.2	0	1.24	0	41	1									24.6245	2	107.223	3	4.35434	3.80233	3	1.27538	2	1.59246	3	153.305	3
10.	74	M	73	1.58	29.2421	3	1	0	0	100	60	1	1	1	0.8	0	1.07	0	20	0			190	0	44	1			20.4312	2	89.7318	1	4.3919	3.81754	3	0.385184	1	1.01884	2	123.528	3
3.	67	M	66	1.76	21.3068	2	1	0	1	115	65	0	3	2	7.5	1	1.45	1	55	1									22.4765	2	95.3557	2	4.24247	3.86165	3	0.486843	1	1.88656	3	125.228	3
102.	66	M	83	1.75	27.102	3	0	0	1	110	70	0	1	1	0.9	0	1.02	0	42	1	172	1	234	1	50	1	202	1	23.6925	2	104.197	3	4.39788	3.93387	3	0.731702	1	0.930146	2	128.482	3
101.	63	K	88	1.68	31.1791	4	1	0	1	115	70	1	4	2	4.8	0	0.71	0	33	0	241.9	1	185.04	0	20.03	0	116.63	1	26.1961	3	129.651	3	4.94923	4.13636	3	1.27439	2	5.03202	3	170.235	3
122.	67	M	89	1.75	29.0612	3	1	1	1			0	2	1	2.2	0	0.81	0	31	0	172	1	234	1	50	1	202	1	24.1727	2	160.6	3	6.64385	4.19477	3	66.501	3	10.6979	3	148.218	3
98.	65	M	97	1.7	33.564	4	0	1	1	150	90	1	3	2	0.6	0	0.85	0	49	1	530	1	164	0	23	0			18.1299	1	114.228	3	6.30054	4.26626	3	0.891356	2	3.1708	3	158.67	3
28.	70	K	59	1.56	24.2439	2	0	1	1	90	50	0	4	2	4.3	0	1.2	0	71	1	88	0	119	0	25.6	0	93	0	24.1977	2	117.626	3	4.86103	4.36089	3	4.0753	3	2.63046	3	114.006	3
120.	79	K	80.5	1.58	32.2464	4	0	1	1	90	60	1	1	1	0.5	0	1.18	0	51	1									23.8899	2	121.398	3	5.08155	4.36137	3	0.885624	2	1.06971	2	137.026	3
26.	65	M	83	1.73	27.7323	3	0	0	1	115	80	1	2	1	0.3	0	0.77	0	52	1	79	0	146	0	39	0	91	1	27.5295	3	119.398	3	4.3371	4.59872	3	0.503461	1	2.9885	3	242.553	3
136.	63	M	100	1.79	31.21	4	1	0	1	120	65	1	1	1	0.9	0	0.97	0	47	1	172	1	234	1	50	1	202	1	22.4039	2	117.146	3	5.22884	4.67823	3	0.918788	2	1.34065	3	187.95	3
117.	75	M	66	1.65	24.2424	2	0	0	1	110	60	0	2	1	3.3	0	0.86	0	35	0									25.4476	3	162.694	3	6.39329	5.08099	3	1.72571	3	1.87795	3	247.797	3
147.	77	K	76	1.64	28.257	3	0	0	1	110	70	0	2	1	3.6	0	0.74	0	28	0	195	1	152	0	47.5	0	86	1	23.3737	2	106.36	3	4.55041	5.39266	3	1.69367	3	1.76224	3	146.926	3
119.	64	M	74	1.73	24.7252	2	1	0	1	110	70	1	1	1	0.3	0	0.79	0	30	0									21.8469	2	108.468	3	4.96491	5.39598	3	0.886762	2	1.07886	2	126.166	3
111.	40	M	60	1.65	22.0386	2	0	0	1	105	70	0	2	1	0.8	0	0.81	0	20	0									23.4889	2	104.451	3	4.44681	5.4849	3	0.928866	2	0.779158	2	181.492	3
134.	79	K	57	1.55	23.7253	2	0	0	1	115	70	0	3	2	0.4	0	0.85	0	37	0									19.6062	1	257.379	3	13.1275	5.49654	3	78.0809	3	9.63807	3	201.293	3
164.	68	M	72	1.65	26.4463	3	0	1	1	120	70	0	2	1	0.7	0	0.8	0	32	0	134.1	0	213	1	34.1	0	152.48	1	23.8329	2	114.466	3	4.80285	5.72396	3	1.11441	2	1.78207	3	172.731	3
40.	67	M	88.5	1.68	31.3563	4	0	1	1	100	60	1	1	1	1.4	0	1.04	0	44	1									22.2034	2	100.824	2	4.54091	5.89285	3	0.7	1	6.12705	3	176.316	3
91.	73	K	75	1.45	35.6718	4	0	0	1	130	80	0	3	2	17.3	1	1.07	0	40	0									16.0872	1	87.4462	1	5.43576	5.9563	3	0.939397	2	2.76887	3	263.927	3
189.	76	M	90	1.68	31.8878	4	0	1	1	120	60	1	2	1	1.6	0	1.06	0	54	1	104	0	185	0	33.1	0	51	0	19.7775	1	99.6691	2	5.03952	7.66913	3	1.39362	2	1.53868	3	195.444	3
135.	58	M	106	1.83	31.6522	4	0	1	1			0	1	1	1.1	0	0.86	0	27	0									19.7293	1	119.533	3	6.05863	8.69611	3	1.4208	2	1.2022	3	189.479	3
152.	67	M	91	1.72	30.7599	4	0	0	1			1	3	2	75.2	1	6.83	1	43	1	146	0	195	1	25	0	47	0	20.8979	2	102.991	3	4.92829	9.48899	3	1.74576	3	1.45199	3	150.96	3
